# Supplementary material for: Plant growth-promoting endophytic bacteria versus pathogenic infections: an example of Bacillus amyloliquefaciens RWL-1 and Fusarium oxysporum f. sp. lycopersici in tomato
Source: PeerJ. 2017 Mar 16;5:e3107. doi: 10.7717/peerj.3107 (PMC5357341; doi:10.7717/peerj.3107)
Supplement: Supplemental Information 2 [file peerj-05-3107-s002.xls]

## Sheet: Sheet1
	JA
	R1	R2	R3	Mean	SD
Cont	11.07	11.89	12.2	11.72	0.583866	a
RWL-1	9.2	9.01	8.94	9.05	0.134536	b
Fusarium Oxysporum	26.39	27.82	26.79	27	0.737767	a
RWL-1+Fusarium Oxysporum	22	21.7	21.05	21.5833	0.485627	b
	SA
	R1	R2	R3	Mean	SD
Cont	7.5	7.06	7.38	7.31333	0.22745	b
RWL-1	14.18	15.29	14.14	14.5367	0.652712	a
Fusarium Oxysporum	17.17	17.8	16.87	17.28	0.474658	b
RWL-1+Fusarium Oxysporum	22.98	23.41	23.21	23.2	0.215174	a
