# Supplementary material for: Plant growth-promoting endophytic bacteria versus pathogenic infections: an example of Bacillus amyloliquefaciens RWL-1 and Fusarium oxysporum f. sp. lycopersici in tomato
Source: PeerJ. 2017 Mar 16;5:e3107. doi: 10.7717/peerj.3107 (PMC5357341; doi:10.7717/peerj.3107)
Supplement: Supplemental Information 3 [file peerj-05-3107-s003.xls]

## Sheet: Sheet1
	Citric Acid mg/ml						Succinic Acid mg/ml
	R1	R2	R3	Mean	SD		R1	R2	R3	Mean	SD
	0.39	0.42	0.37	0.393333	0.0251661		0.12	0.09	0.15	0.12	0.03
	Acetic Acid mg/ml						Propionic Acid mg/ml
	R1	R2	R3	Mean	SD		R1	R2	R3	Mean	SD
	0.58	0.63	0.47	0.56	0.0818535		0.16	0.13	0.19	0.16	0.03
	ug/ml
	R1	R2	R3	Mean	SD
Citric Acid	390	420	370	393.333	25.1661	b
Succinic Acid	120	90	150	120	30	d
Acetic Acid	580	630	470	560	81.8535	a
Propionic Acid	160	130	190	160	30	c
